# Supplementary material for: Screening TLR4 Binding Peptide from Naja atra Venom Glands Based on Phage Display
Source: MDPI journal article supplement (doi:10.3390/toxins16030113), 2024-02-24
Supplement: s1 [file s1]

TLR4 Coupling

Immobilization Wizard results

Chip: CM5  
Flow cells per cycle: 1

| Flow cell | Procedure    | Method | Ligand | Response Bound (RU) | Response Final (RU) | Target Reached |
|-----------|--------------|--------|--------|---------------------|---------------------|----------------|
| 4         | Target level | Amine  | TLR4   | 2290.6              | 2136.6              | Yes            |

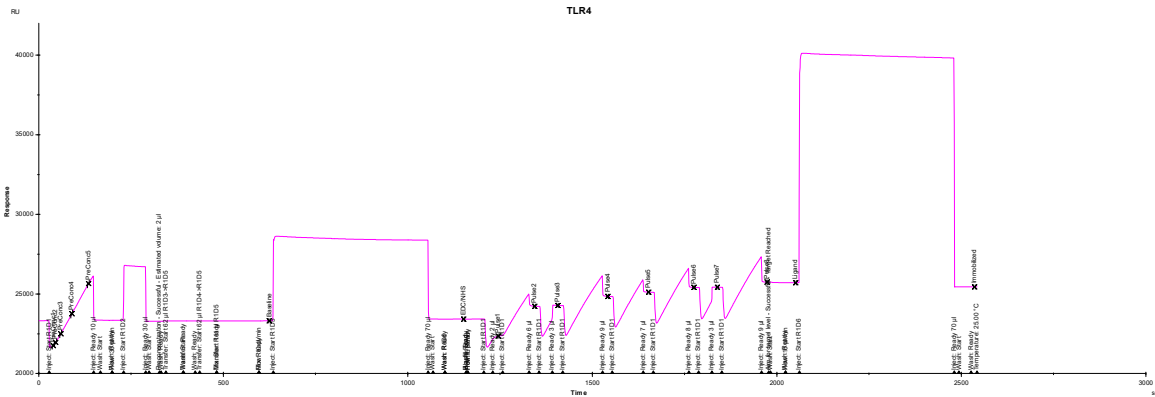

Regeneration Condition

Regeneration scouting result

Trend Chart

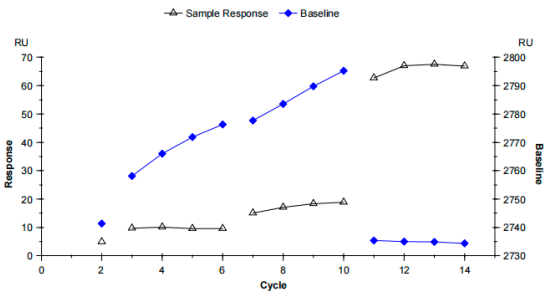

Subtracted Fc=4-3

Selected conditions

|             |                                 |
|-------------|---------------------------------|
| Condition 1 | Solution: Glycine-Hcl3.0, 30(s) |
| Condition 2 | Solution: Glycine-Hcl2.5, 30(s) |
| Condition 3 | Solution: Glycine-Hcl2.0, 30(s) |

Sensorgrams

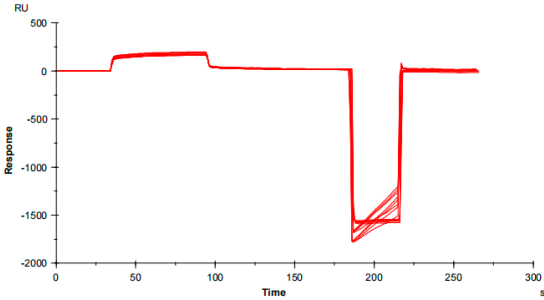

Sensorgram Fc=3

Included cycles for each condition: 1, 2, 3, 4

Selected conditions

|             |                                 |
|-------------|---------------------------------|
| Condition 1 | Solution: Glycine-Hcl3.0, 30(s) |
| Condition 2 | Solution: Glycine-Hcl2.5, 30(s) |
| Condition 3 | Solution: Glycine-Hcl2.0, 30(s) |

TLR4-NA39 Kinetic Raw Sensorgram

Path 4-3

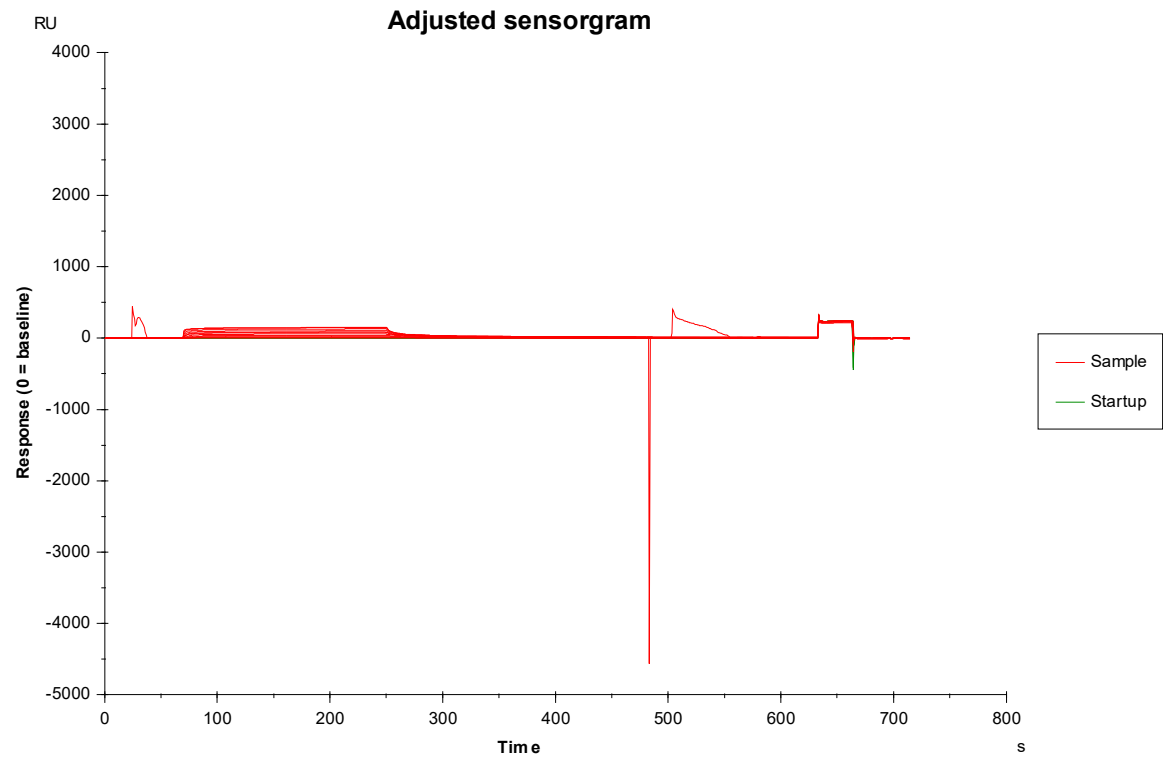

Path 3 Blank Control group

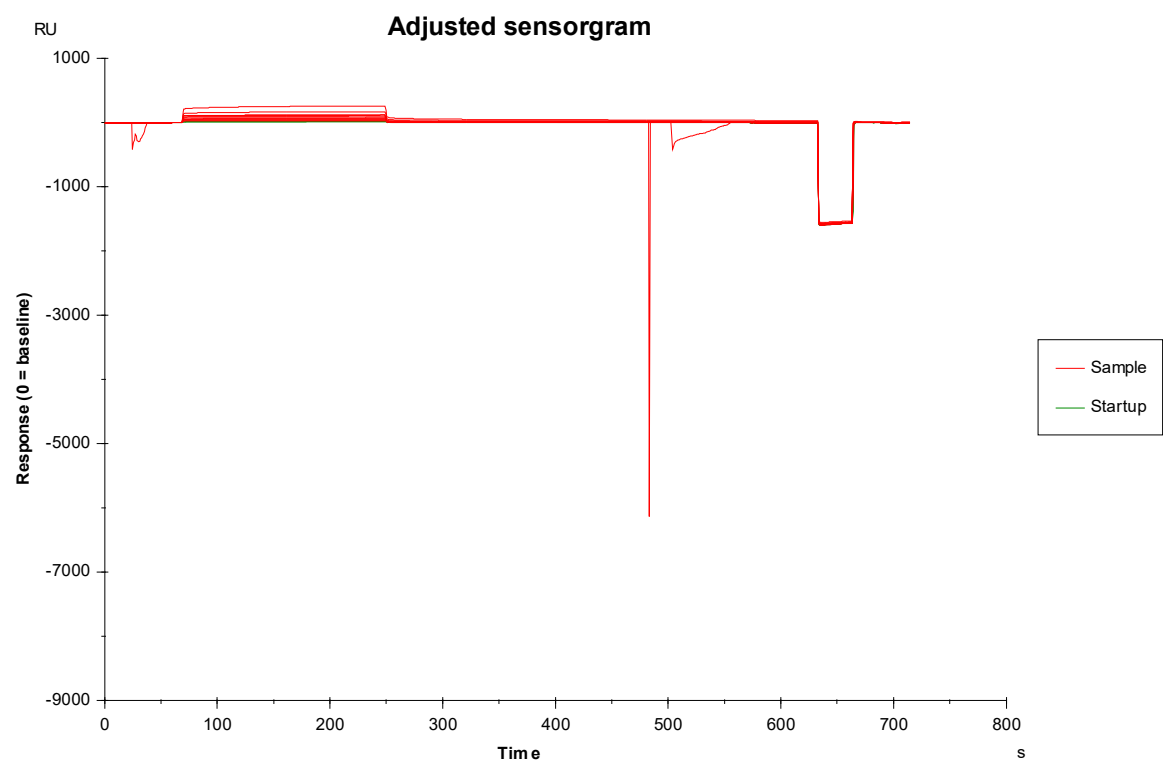

Path 4 Experimental Group

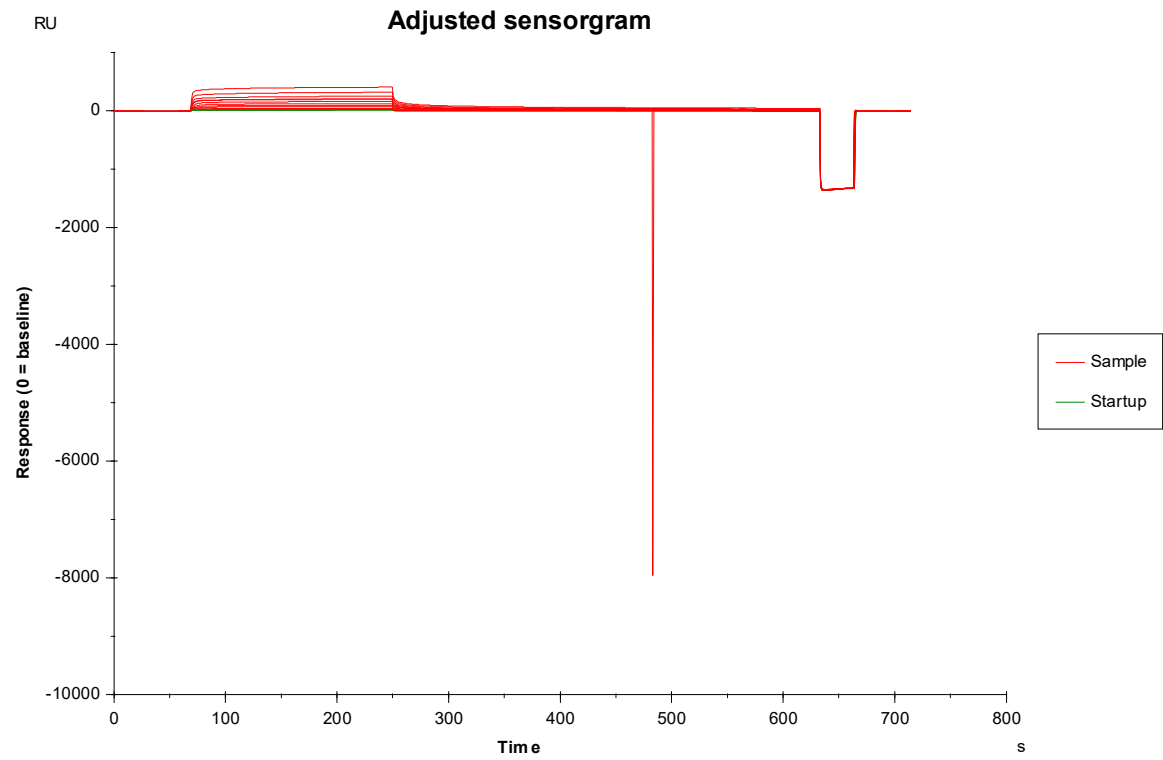

The regeneration time between 600-700s
